# Supplementary material for: Neratinib, a pan ERBB/HER inhibitor, restores sensitivity of PTEN-null, BRAFV600E melanoma to BRAF/MEK inhibition
Source: Front Oncol. 2024 May 16;14:1191217. doi: 10.3389/fonc.2024.1191217 (PMC11159048; doi:10.3389/fonc.2024.1191217)
Supplement: Supplementary file 5 [file Table_4.xlsx]

## Sheet: Epigenetic Inhibitors
Origin	CatalogNo.	Product Name	Targets	Class	96well #1	96well #2	384well High dose
Selleck Custom Library #2	S1013	Bortezomib	Proteosome	Other		A01	I002
Selleck Custom Library #2	S1200	Decitabine (5-aza-2'-deoxycytidine)	DNMT	DNMT		A02	I003
Selleck Custom Library #2	S2170	Givinostat (ITF2357)	HDAC	HDAC		A03	I004
Selleck Custom Library #2	S7061	GSK126	EZH2	HMT		A04	I005
Selleck Custom Library #2	S7233	Bromosporine	pan bromodomain	bromodomains		A05	I006
Selleck Custom Library #2	S7610	UNC0631	G9a	HMT		A06	I007
In house, on 96well #2	S7152	C646	CBP/p300 HAT domain	Acetyl transferase		A07	I008
In house, on 96well #2	Sigma A2385-100MG	5-azacytidine	DNMT	DNMT		A08	I009
In house, on 96well #2	Tocris 5163	A-366	G9a/GLP	HMT		A09	I010
In house, on 96well #2	S7281	JIB-04	pan JMJ demethylase	KDM		A10	I011
Selleck Custom Library #2	S1045	Trichostatin A (TSA)	HDAC	HDAC		B01	J002
Selleck Custom Library #2	S1228	Idarubicin HCl	Topoisomerase II	Topoisomerase		B02	J003
Selleck Custom Library #2	S2244	AR-42 (HDAC-42)	HDAC	HDAC		B03	J004
Selleck Custom Library #2	S7070	GSK-J4	JMJD3/UTX	KDM		B04	J005
Selleck Custom Library #2	S7234	IOX1	pan a-KG oxygenase	KDM & oxygenase		B05	J006
Selleck Custom Library #2	S7656	CPI-360	EZH1	HMT		B06	J007
In house, on 96well #2	Sigma SML1525-5MG	(-)-JQ1	BRD2/3/4 (inactive control)	bromodomains		B07	J008
In house, on 96well #2	S1095	Dacinostat (NVP-LAQ824)	HDAC, activates p21	HDAC		B08	J009
In house, on 96well #2	Millipore 531661	AZ505	SMYD2	HMT		B09	J010
In house, on 96well #2	Millipore 420203	Methylstat (JMJD Inhibitor IV)	JMJD family	KDM		B10	J011
Selleck Custom Library #2	S1069	Luminespib (AUY-922)	HSP90	Other		C01	K002
Selleck Custom Library #2	S1231	Topotecan	Topoisomerase I	Topoisomerase		C02	K003
Selleck Custom Library #2	S2635	CCT128930	AKT2-selective	Kinase		C03	K004
Selleck Custom Library #2	S7088	UNC1215	L3MBTL3	Kme reader		C04	K005
Selleck Custom Library #2	S7276	SGI-1027	DNMT	DNMT		C05	K006
Selleck Custom Library #2	S7748	EPZ015666	PRMT5	HMT		C06	K007
In house, on 96well #2	S7110	(+)-JQ1	BRD2/3/4	bromodomains		C07	K008
In house, on 96well #2	S1053	Entinostat (MS-275)	HDAC	HDAC		C08	K009
In house, on 96well #2	Tocris 5365	LLY-507	SMYD2	HMT		C09	K010
In house, on 96well #2	Millipore 219511	KH-CB19	CLK1/4	kinase		C10	K011
Selleck Custom Library #2	S1085	Belinostat	HDAC	HDAC		D01	L002
Selleck Custom Library #2	S1288	Lactam E ring (Camptothecin (CPT))	Topoisomerase I (inactive control)	Topoisomerase		D02	L003
Selleck Custom Library #2	S2779	M344	HDAC	HDAC		D03	L004
Selleck Custom Library #2	S7113	Zebularine	DNMT	DNMT		D04	L005
Selleck Custom Library #2	S7294	PFI-2	SETD7	HMT		D05	L006
Selleck Custom Library #2	S7832	SGC707	PRMT3	HMT		D06	L007
In house, on 96well #2	S2780	I-BET151	BRD2/3/4	bromodomains		D07	L008
In house, on 96well #2	S1541	Ex527	SIRT1/6	HDAC		D08	L009
In house, on 96well #2	S7079	SGC0946	DOT1L	HMT		D09	L010
In house, on 96well #2	MedKoo CAT#: 206480	PLX7904	BRAF	Kinase		D10	L011
Selleck Custom Library #2	S1090	Abexinostat (PCI-24781)	HDAC1/3/6/2/11	HDAC		E01	M002
Selleck Custom Library #2	S1422	Droxinostat	HDAC8/6	HDAC		E02	M003
Selleck Custom Library #2	S2818	CI994	HDAC1/2/3/8	HDAC		E03	M004
Selleck Custom Library #2	S7164	GSK343	EZH2	HMT		E04	M005
Selleck Custom Library #2	S7315	PFI-3	SMARCA	bromodomains		E05	M006
Selleck Custom Library #2	S7906	PFI-4	BRPF1	bromodomains		E06	M007
In house, on 96well #2	Tocris 4891	I-CBP112	CBP/p300	bromodomains		E07	M008
In house, on 96well #2	S1030	LBH-589 (Panobinostat)	HDAC	HDAC		E08	M009
In house, on 96well #2	Tocris 4343	UNC0638	G9a/GLP	HMT		E09	M010
In house, on 96well #2	S1001	ABT-263 (Navitoclax)	Bcl-xL	Other		E10	M011
Selleck Custom Library #2	S1122	Mocetinostat (MGCD0103)	HDAC1/2/11/3	HDAC		F01	N002
Selleck Custom Library #2	S1484	MC1568	HDAC	HDAC		F02	N003
Selleck Custom Library #2	S2821	RG108	DNMT	DNMT		F03	N004
Selleck Custom Library #2	S7165	UNC1999	EZH2/1	HMT		F04	N005
Selleck Custom Library #2	S7338	AZ191	DYRK1B/A	Kinase		F05	N006
Selleck Custom Library #2	S8005	SMI-4a	PIM1	Kinase		F06	N007
In house, on 96well #2		OTX015	BRD2/3/4	bromodomains		F07	N008
In house, on 96well #2	S1096	Quisinostat (JNJ-26481585)	HDAC1/2/4/10/11	HDAC		F08	N009
In house, on 96well #2	Tocris 5132	UNC0642	G9a/GLP	HMT		F09	N010
In house, on 96well #2	Tocris 4299	iCRT 14	beta-catenin/TCF	Other		F10	N011
Selleck Custom Library #2	S1141	17-AAG (Tanespimycin)	HSP90	Other		G01	O002
Selleck Custom Library #2	S1515	Pracinostat (SB939)	HDAC10/3/5/1/4/9/11…6 sparing	HDAC		G02	O003
Selleck Custom Library #2	S2919	IOX2	PHD2	oxygenase		G03	O004
Selleck Custom Library #2	S7229	RGFP966	HDAC3	HDAC		G04	O005
Selleck Custom Library #2	S7570	UNC0379	SETD8	HMT		G05	O006
Selleck Custom Library #2	S8049	Tubastatin	HDAC6	HDAC		G06	O007
In house, on 96well #2	S7256	SGC-CBP30	CBP/p300 bromodomain	bromodomains		G07	O008
In house, on 96well #2	S1047	Vorinostat (SAHA)	HDAC	HDAC		G08	O009
In house, on 96well #2	Tocris 5057	UNC2327	PRMT3	HMT		G09	O010
In house, on 96well #2		UMI-77	Mcl-1	Other		G10	O011
Selleck Custom Library #2	S1194	CUDC-101	HDAC/EGFR/ERBB2	HDAC		H01	P002
Selleck Custom Library #2	S2012	PCI-34051	HDAC8	HDAC		H02	P003
Selleck Custom Library #2	S3020	Romidepsin (FK228)	HDAC1/2	HDAC		H03	P004
Selleck Custom Library #2	S7231	GSK2801	BAZ2B/A	bromodomains		H04	P005
Selleck Custom Library #2	S7596	CAY10603	HDAC6	HDAC		H05	P006
Selleck Custom Library #2	S8064	Midostaurin (PKC412)	PKCa/g/b/VEGFR2	Kinase		H06	P007
In house, on 96well #2	Tocris 5361	GSK-LSD1	LSD1	demethylase		H07	P008
In house, on 96well #2	S2759	CUCD-907	PI3K/HDAC	HDAC + kinase		H08	P009
In house, on 96well #2	Tocris 4905	UNC2400	EZH2 (inactive control for UNC1999)	HMT		H09	P010
In house, on 96well #2		Vismodegib (GDC-0449)	Hh	Other		H10	P011

## Sheet: Kinase Inhibitors
Origin	CatalogNo.	Product Name	Targets	Class	96well #1	96well #2	384well High dose
Selleck Custom Library #1	S1004	Veliparib (ABT-888)	PARP	Other	A01		A002
Selleck Custom Library #1	S1023	Erlotinib HCl (OSI-744)	EGFR	Kinase	A02		A003
Selleck Custom Library #1	S1046	Vandetanib (ZD6474)	VEGFR, RET	Kinase	A03		A004
Selleck Custom Library #1	S1101	Vatalanib (PTK787) 2HCl	c-Kit,VEGFR	Kinase	A04		A005
Selleck Custom Library #1	S1133	Alisertib (MLN8237)	Aurora Kinase	Kinase	A05		A006
Selleck Custom Library #1	S1476	SB525334	TGFBR1	Kinase	A06		A007
Selleck Custom Library #1	S2183	BGJ398 (NVP-BGJ398)	FGFR	Kinase	A07		A008
Selleck Custom Library #1	S2248	CX-4945 (Silmitasertib)	CK2	Kinase	A08		A009
Selleck Custom Library #1	S2735	MK-8776 (SCH 900776)	Chk1	Kinase	A09		A010
Selleck Custom Library #1	S2924	CHIR-99021 (CT99021) HCl	GSK-3	Kinase	A10		A011
Selleck Custom Library #1	S7215	Losmapimod (GW856553X)	p38 MAPK	Kinase	A11		A012
Selleck Custom Library #1	S1005	Axitinib	c-Kit,VEGFR,PDGFR	Kinase	B01		B002
Selleck Custom Library #1	S1025	Gefitinib (ZD1839)	EGFR	Kinase	B02		B003
Selleck Custom Library #1	S1048	VX-680 (Tozasertib, MK-0457)	Aurora Kinase	Kinase	B03		B004
Selleck Custom Library #1	S1107	Danusertib (PHA-739358)	c-RET,FGFR,Bcr-Abl,Aurora Kinase	Kinase	B04		B005
Selleck Custom Library #1	S1147	Barasertib (AZD1152-HQPA)	Aurora Kinase	Kinase	B05		B006
Selleck Custom Library #1	S1525	MK-1775	Wee1	Kinase	B06		B007
Selleck Custom Library #1	S2194	R406	Syk,FLT3	Kinase	B07		B008
Selleck Custom Library #1	S2475	Imatinib (STI571)	PDGFR	Kinase	B08		B009
Selleck Custom Library #1	S2768	Dinaciclib (SCH727965)	CDK1/2/5/9	Kinase	B09		B010
Selleck Custom Library #1	S4901	JNK-IN-8	JNK	Kinase	B10		B011
Selleck Custom Library #1	S7270	SRPIN340	SRPK1/2	Kinase	B11		B012
Selleck Custom Library #1	S1006	Saracatinib (AZD0530)	Src,Bcr-Abl	Kinase	C01		C002
Selleck Custom Library #1	S1026	Imatinib Mesylate (STI571)	c-Kit,Bcr-Abl,PDGFR	Kinase	C02		C003
Selleck Custom Library #1	S1049	Y-27632 2HCl	ROCK	Kinase	C03		C004
Selleck Custom Library #1	S1109	BI-2536	PLK/BRD4	Kinase	C04		C005
Selleck Custom Library #1	S1152	PLX-4720	Raf	Kinase	C05		C006
Selleck Custom Library #1	S1561	BMS-777607	Axl,c-Met	Kinase	C06		C007
Selleck Custom Library #1	S2198	SGI-1776 free base	Pim	Kinase	C07		C008
Selleck Custom Library #1	S2658	Omipalisib (GSK2126458, GSK458)	PI3K/mTOR	Kinase	C08		C009
Selleck Custom Library #1	S2783	AZD2014	mTOR	Kinase	C09		C010
Selleck Custom Library #1	S7000	AP26113	ALK	Kinase	C10		C011
Selleck Custom Library #1	S7320	TG003	CLK1/2/4	Kinase	C11		C012
Selleck Custom Library #1	S1008	Selumetinib (AZD6244)	MEK	Kinase	D01		D002
Selleck Custom Library #1	S1028	Lapatinib (GW-572016) Ditosylate	HER2,EGFR	Kinase	D02		D003
Selleck Custom Library #1	S1060	Olaparib (AZD2281, Ku-0059436)	PARP	Other	D03		D004
Selleck Custom Library #1	S1113	GSK690693	Akt	Kinase	D04		D005
Selleck Custom Library #1	S1169	TGX-221	PI3K (p110 beta)	Kinase	D05		D006
Selleck Custom Library #1	S1573	Fasudil (HA-1077) HCl	ROCK,Autophagy	Kinase	D06		D007
Selleck Custom Library #1	S2202	NVP-BHG712	EPHB4	Kinase	D07		D008
Selleck Custom Library #1	S2673	Trametinib (GSK1120212)	MEK	Kinase	D08		D009
Selleck Custom Library #1	S2789	Tofacitinib (CP-690550,Tasocitinib)	JAK	Kinase	D09		D010
Selleck Custom Library #1	S7101	SCH772984	ERK	Kinase	D10		D011
Selleck Custom Library #1	S7359	K02288	BMPR	Kinase	D11		D012
Selleck Custom Library #1	S1010	Nintedanib (BIBF 1120)	VEGFR,PDGFR,FGFR	Kinase	E01		E002
Selleck Custom Library #1	S1034	NVP-AEW541	IGF-1R	Kinase	E02		E003
Selleck Custom Library #1	S1065	GDC-0941	PI3K (pan)	Kinase	E03		E004
Selleck Custom Library #1	S1116	Palbociclib (PD-0332991) HCl	CDK4/6	Kinase	E04		E005
Selleck Custom Library #1	S1180	XAV-939	beta-catenin (Tankyrase)	Other	E05		E006
Selleck Custom Library #1	S1594	Semagacestat (LY450139)	Notch (gamma-secretase)	Kinase	E06		E007
Selleck Custom Library #1	S2214	AZ 960	JAK	Kinase	E07		E008
Selleck Custom Library #1	S2679	Flavopiridol HCl	CDK1/2/4/6	Kinase	E08		E009
Selleck Custom Library #1	S2807	Dabrafenib (GSK2118436)	Raf	Kinase	E09		E010
Selleck Custom Library #1	S7104	AZD1208	Pim	Kinase	E10		E011
Selleck Custom Library #1	S7530	EW-7197	TGFBR1,ALK4,ALK7	Kinase	E11		E012
Selleck Custom Library #1	S1011	Afatinib (BIBW2992)	EGFR,HER2	Kinase	F01		F002
Selleck Custom Library #1	S1039	Rapamycin (Sirolimus)	mTOR	Kinase	F02		F003
Selleck Custom Library #1	S1068	Crizotinib (PF-02341066)	c-Met,ALK	Kinase	F03		F004
Selleck Custom Library #1	S1119	Cabozantinib (XL184, BMS-907351)	FLT3,Tie-2,c-Kit,c-Met,VEGFR,Axl	Kinase	F04		F005
Selleck Custom Library #1	S1267	Vemurafenib (PLX4032, RG7204)	Raf	Kinase	F05		F006
Selleck Custom Library #1	S2013	PF-573228	FAK1	Kinase	F06		F007
Selleck Custom Library #1	S2226	CAL-101 (Idelalisib, GS-1101)	PI3K (p110 delta)	Kinase	F07		F008
Selleck Custom Library #1	S2680	Ibrutinib (PCI-32765)	BTK	Kinase	F08		F009
Selleck Custom Library #1	S2814	BYL719	PI3K (p110 alpha)	Kinase	F09		F010
Selleck Custom Library #1	S7143	LGK-974	porcupine	Other	F10		F011
Selleck Custom Library #1	S7536	PF-06463922	ALK,ROS1,FAK	Kinase	F11		F012
Selleck Custom Library #1	S1018	Dovitinib (TKI-258, CHIR-258)	FGFR,FLT3,c-Kit,VEGFR,PDGFR	Kinase	G01		G002
Selleck Custom Library #1	S1040	Sorafenib Tosylate	PDGFR,Raf,VEGFR	Kinase	G02		G003
Selleck Custom Library #1	S1078	MK-2206 2HCl	Akt	Kinase	G03		G004
Selleck Custom Library #1	S1120	Everolimus (RAD001)	mTOR	Kinase	G04		G005
Selleck Custom Library #1	S1378	Ruxolitinib (INCB018424)	JAK	Kinase	G05		G006
Selleck Custom Library #1	S2150	Neratinib (HKI-272)	HER2,EGFR	Kinase	G06		G007
Selleck Custom Library #1	S2235	Volasertib (BI 6727)	PLK	Kinase	G07		G008
Selleck Custom Library #1	S2703	GSK1838705A	IGF-1R,ALK	Kinase	G08		G009
Selleck Custom Library #1	S2820	TAE226 (NVP-TAE226)	FAK1/2	Kinase	G09		G010
Selleck Custom Library #1	S7147	LDN-212854	BMPR	Kinase	G10		G011
Selleck Custom Library #1	S7654	Defactinib (VS-6063, PF-04554878)	FAK1	Kinase	G11		G012
Selleck Custom Library #1	S1021	Dasatinib	Bcr-Abl,c-Kit,Src	Kinase	H01		H002
Selleck Custom Library #1	S1042	Sunitinib Malate	VEGFR,PDGFR,c-Kit	Kinase	H02		H003
Selleck Custom Library #1	S1092	KU-55933 (ATM Kinase Inhibitor)	ATM/ATR	Kinase	H03		H004
Selleck Custom Library #1	S1124	BMS-754807	IGF-1R,Trk receptor,c-Met	Kinase	H04		H005
Selleck Custom Library #1	S1460	SP600125	JNK	Kinase	H05		H006
Selleck Custom Library #1	S2163	PF-4708671	p70S6K	Kinase	H06		H007
Selleck Custom Library #1	S2247	BKM120 (NVP-BKM120, Buparlisib)	PI3K (pan)	Kinase	H07		H008
Selleck Custom Library #1	S2726	PH-797804	p38 MAPK	Kinase	H08		H009
Selleck Custom Library #1	S2843	BI-D1870	RSK	Kinase	H09		H010
Selleck Custom Library #1	S7209	GSK650394	SGK	Kinase	H10		H011
Selleck Custom Library #1	S7704	LY2584702 Tosylate	p70S6K	Kinase	H11		H012
Selleck Custom Library #1	S7854	Ulixertinib (BVD-523, VRT752271)	ERK	Kinase	A12		I012
Selleck Custom Library #1	S8078	Bardoxolone Methyl	IKKb	Kinase	B12		J012
In house, on 96well #1	S7094	PF-3758309	PAK4/1/6/5	Kinase	C12		K012
In house, on 96well #1	From Chernoff	FRAX-1036	PAK1/2/3	Kinase	D12		L012
In house, on 96well #1	S2736	Fedratinib	JAK/BRD	Kinase	E12		M012
In house, on 96well #1	S1524	AT7519	CDK9/CDK5	Kinase	F12		N012
In house, on 96well #1	MedChemExpress HY-16462	CDK9 inhibitor 2	CDK9	Kinase	G12		O012
In house, on 96well #1	###?	THZ1	CDK7	Kinase	H12		P012
